# Supplementary material
Source: HighWire-hosted journal article supplement (https://gocm.bmj.com/content/2/3/129)
Supplement: inline-supplementary-material-3 [file inline-supplementary-material-3.docx]

Supplementary Table1. List of excluded articles.

| Author | Year | Country | Study design | Results | Reason of exclusion |
| --- | --- | --- | --- | --- | --- |
| Zelalem Belayneh | 2019 | Ethiopia | Cross-sectional | 68.3% of adolescent women had poor knowledge of menstruation and 60.3% of girls had poor menstrual hygienic practice. | The current article focused on the assessment of knowledge and menstrual hygiene practice rather than its relation to infections |
| Rajesh Garg | 2011 | India | Cross-sectional | Majority of adolescent girls in villages use rags and old clothes during menstruation, increasing the risk of reproductive tract infections (RTI’s). Adolescent girls' health needs is unaddressed in the national welfare programs. unhygenic menstrual habits in developing countries remain an unacknowledged issue. | The current article focused on the issue of menstrual hygiene from the social and human rights values attached to it rather than from the health point of view and its relation to infection |
| Bisiayo Fashemi | 2013 | USA | Experimental study | Most over the counter vaginal products may be harmful to Lactobacillus crispatus that is necessary for preservation of the function of vaginal epithelium. | It's a laboratory based experimental study |
